# Supplementary material
Source: PubMed Central journal article supplement (PMC4734899)
Supplement: NIHMS731657-supplement-Supp_TableS1.pdf [file NIHMS731657-supplement-Supp_TableS1.pdf]

| <b>Supplementary Table 1. Logistic Regression of Juice Intake on Weight Status by Age (&lt;1 Serving vs. &gt;1 Serving Daily)</b> |                           |                      |
|-----------------------------------------------------------------------------------------------------------------------------------|---------------------------|----------------------|
| <b>Juice</b>                                                                                                                      | <b>Overweight OR (CI)</b> | <b>Obese OR (CI)</b> |
| <b>Age 2 years</b>                                                                                                                |                           |                      |
| Model 0 (no adjustments)                                                                                                          | 0.897 (0.755-1.066)       | 0.846 (0.666-1.074)  |
| Model 1 (adjusted for sex, race/ethnicity, SES)                                                                                   | 0.845 (0.700-1.019)       | 0.787 (0.622-0.995)  |
| Model 2 (adjusted for sex, race/ethnicity, SES, maternal BMI)                                                                     | 0.838 (0.693-1.014)       | 0.778 (0.614-0.987)  |
| <b>Age 4 years</b>                                                                                                                |                           |                      |
| Model 0 (no adjustments)                                                                                                          | 1.107 (0.966-1.267)       | 1.110 (0.950-1.296)  |
| Model 1 (adjusted for sex, race/ethnicity, SES)                                                                                   | 1.050 (0.920-1.198)       | 1.034 (0.885-1.208)  |
| Model 2 (adjusted for sex, race/ethnicity, SES, maternal BMI)                                                                     | 1.108 (0.97-1.265)        | 1.096 (0.938-1.280)  |
| <b>Age 5 years</b>                                                                                                                |                           |                      |
| Model 0 (no adjustments)                                                                                                          | 1.001 (0.848-1.181)       | 1.168 (0.977-1.396)  |
| Model 1 (adjusted for sex, race/ethnicity, SES)                                                                                   | 0.912 (0.774-1.076)       | 1.038 (0.864-1.248)  |
| Model 2 (adjusted for sex, race/ethnicity, SES, maternal BMI)                                                                     | 0.974 (0.822-1.155)       | 1.119 (0.921-1.360)  |
